# Supplementary material
Source: publisher figshare collection journal article supplement (https://frontiersin.figshare.com/ndownloader/files/13436861)

**A****Cortical MEG waveforms**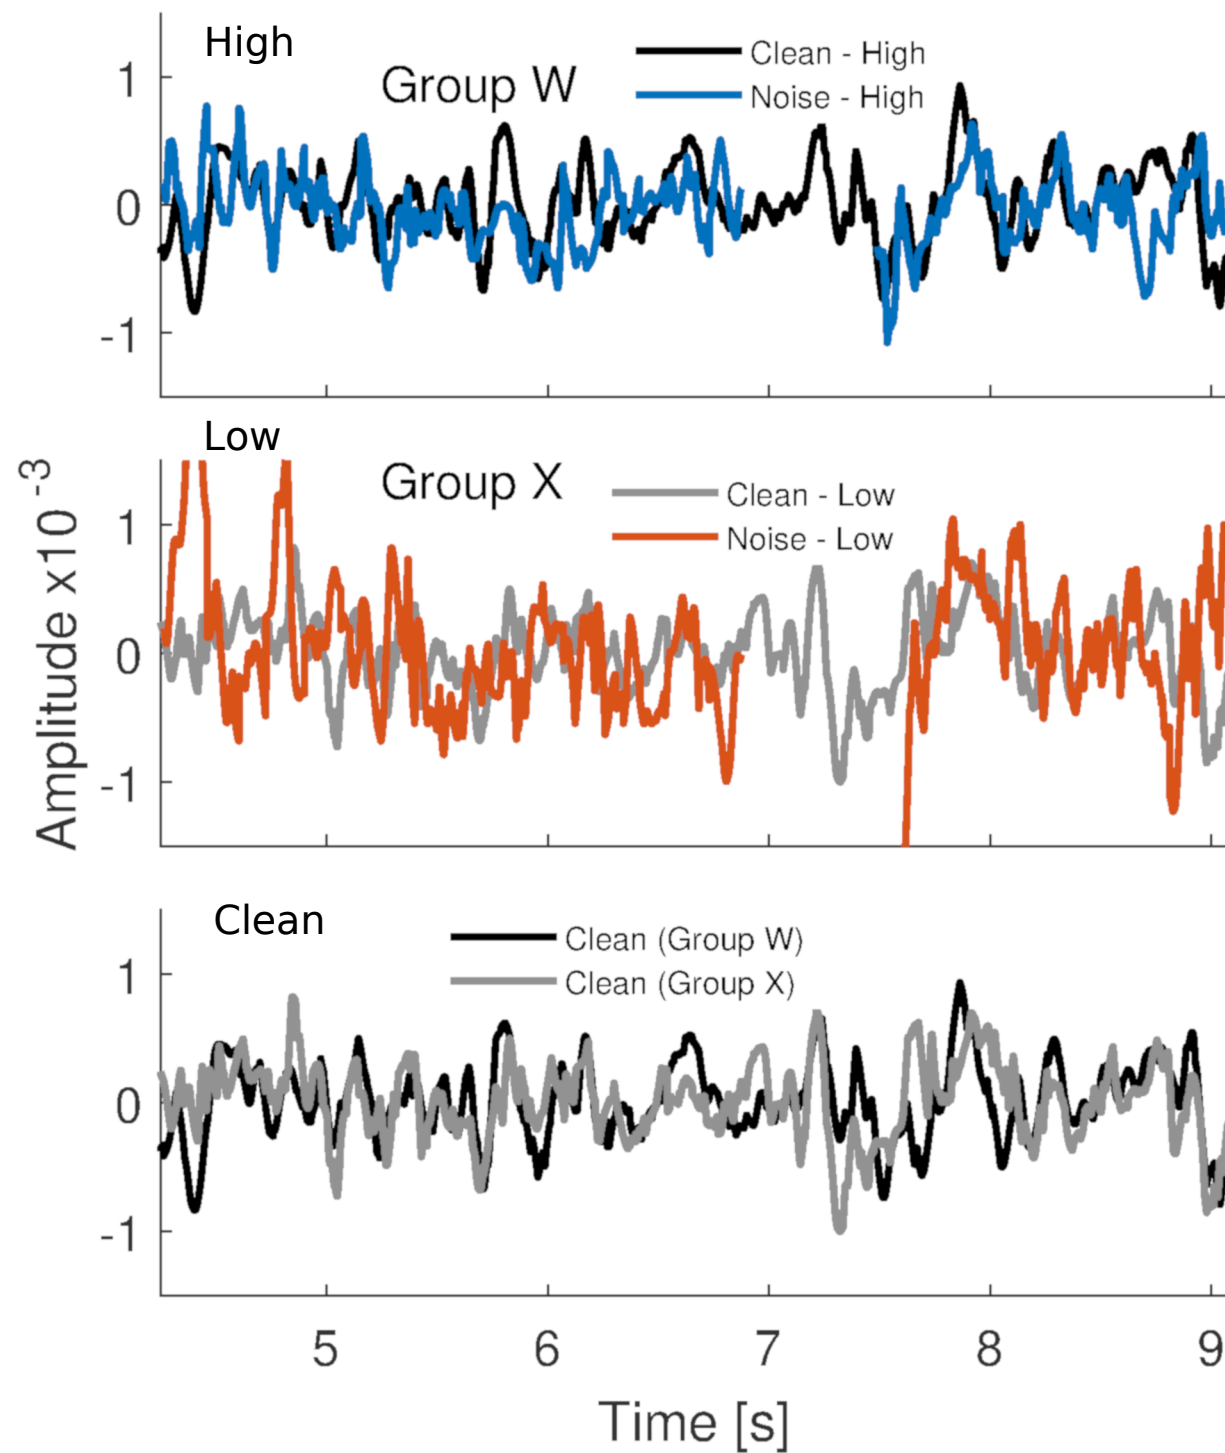**B****Waveform correlations**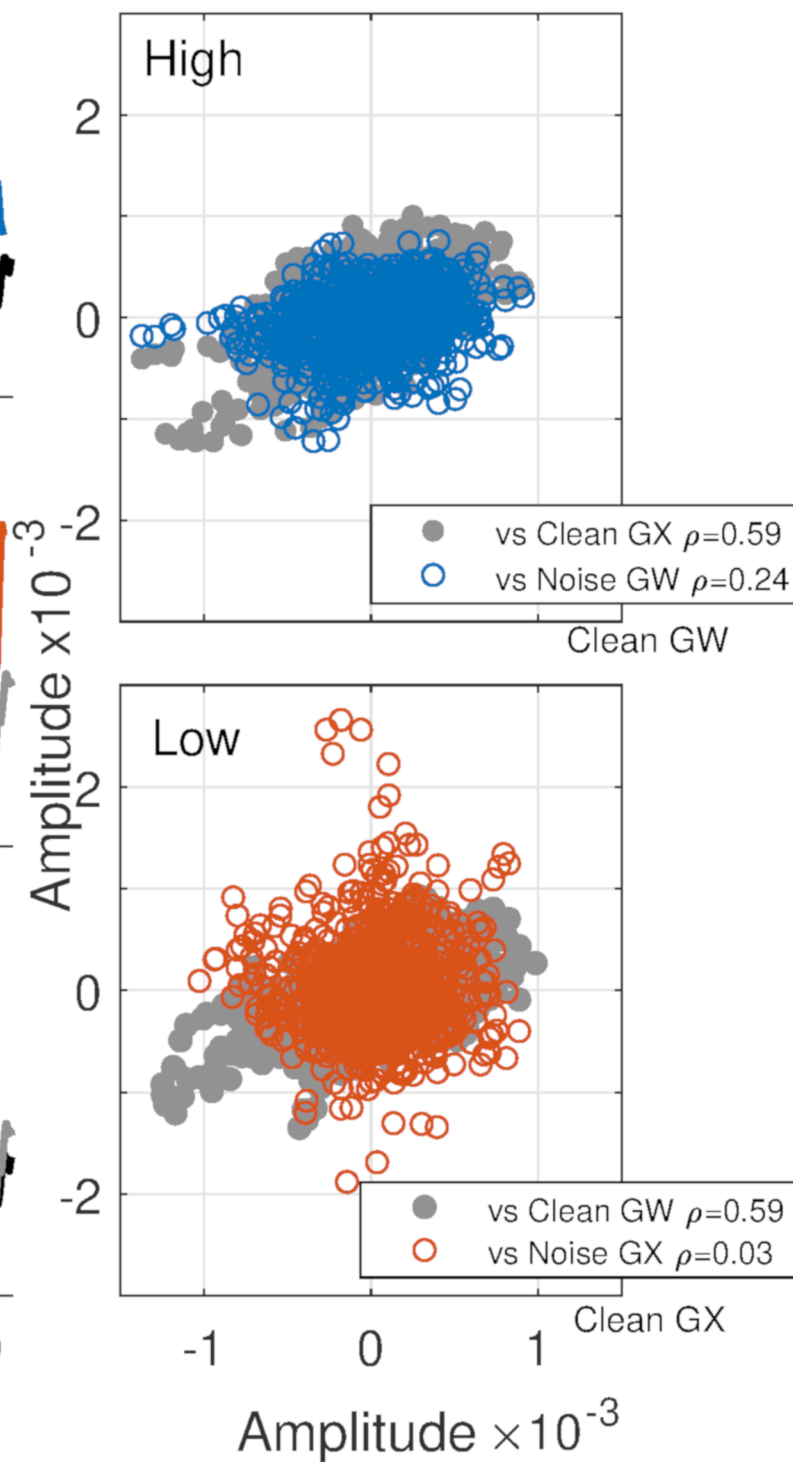

Supplement: Supplementary file [file 13436861]
